# Supplementary material for: Three-dimensional missense tolerance ratio analysis
Source: HighWire-hosted journal article supplement (doi:10.1101/gr.275528.121), 2021-07-22
Supplement: Supplemental_Dataset_2.xlsx [file Supplemental_Dataset_2.xlsx]

## Sheet: mutant_variant_Data
	Supplemental Dataset 2A: Published mutant variant EC50 and 1D/3DMTR analysis dataset. Each mutant has been converted so that the residue numbering starts with the initiating methionine as 1 (see "Residue Numbering in Publication" for the published residue number). The mutant receptor complex tested is noted (receptor) and the mutated gene (gene); with the specific residue change noted (in short f…
entry	receptor	gene	species	Publication Source	proChange	WT AA	Mut AA	AA Num	codon	SNV?	Subunit Domain	gluEC50	pGluEC50	comment	Residue Numbering in Publication	1DMTR	3DMTR c31_MTR	3DMTR c31_Pvalue
292	GRIN1/GRIN2A	GRIN2A		Chen 2005	H485A	His	Ala	485	CAT	FALSE	S1	490	2.6902		466	0.489011	0.170122	0.0029627
293	GRIN1/GRIN2A	GRIN2A		Chen 2005	H485F	His	Phe	485	CAT	FALSE	S1	46.2	1.66464		466	0.489011	0.170122	0.0029627
294	GRIN1/GRIN2A	GRIN2A		Chen 2005	S511A	Ser	Ala	511	TCG	TRUE	S1	146	2.16435		492	0.476777	0.289029	0.0263574
295	GRIN1/GRIN2A	GRIN2A		Chen 2005	S511P	Ser	Pro	511	TCG	TRUE	S1	68	1.83251		492	0.476777	0.289029	0.0263574
296	GRIN1/GRIN2A	GRIN2A		Chen 2005	T513A	Thr	Ala	513	ACC	TRUE	S1	482	2.68305		494	0.481521	0.0916036	0.000434432
297	GRIN1/GRIN2A	GRIN2A		Chen 2005	S689G	Ser	Gly	689	AGC	TRUE	S2	421	2.62428		670	0.822115	0.0910766	0.000462938
298	GRIN1/GRIN2A	GRIN2A		Chen 2005	T690A	Thr	Ala	690	ACG	TRUE	S2	2967	3.47232		671	0.783217	0.132752	0.000287533
299	GRIN1/GRIN2A	GRIN2A		Chen 2005	V734M	Val	Met	734	GTC	FALSE	S2	1.7	0.230449		715	0.465952	0.235588	0.00360141
300	GRIN1/GRIN2A	GRIN2A		Erreger 2007	G486V	Gly	Val	486	GGC	TRUE	S1	3000	3.47712		467	0.472925	0.240944	0.0158944
301	GRIN1/GRIN2A	GRIN2A		Erreger 2007	R518A	Arg	Ala	518	CGT	FALSE	S1	3000	3.47712		499	0.41638	0.328818	0.0457276
302	GRIN1/GRIN2A	GRIN2A		Erreger 2007	R518K	Arg	Lys	518	CGT	FALSE	S1	3000	3.47712		499	0.41638	0.328818	0.0457276
303	GRIN1/GRIN2A	GRIN2A		Erreger 2007	S689A	Ser	Ala	689	AGC	FALSE	S2	1.6	0.20412		670	0.822115	0.0910766	0.000462938
304	GRIN1/GRIN2A	GRIN2A		Erreger 2007	Y730F	Tyr	Phe	730	TAC	TRUE	S2	143	2.15534		711	0.490244	0.189533	0.00481473
305	GRIN1/GRIN2A	GRIN2A		Erreger 2007	D731A	Asp	Ala	731	GAT	TRUE	S2	3000	3.47712		712	0.490809	0.247864	0.0109024
306	GRIN1/GRIN2A	GRIN2A		Erreger 2007	Y761F	Tyr	Phe	761	TAT	TRUE	S2	40	1.60206		742	0.489395	0.178878	0.0038224
330	GRIN1/GRIN2A	GRIN1		Inanobe 2005	V689A	Val	Ala	689	GTG	TRUE	S2	4.36	0.639486			0.288026	0.106525	0.0272233
331	GRIN1/GRIN2A	GRIN1		Inanobe 2005	F754L	Phe	Leu	754	TTC	TRUE	S2	3.97	0.598791			0.289431	0.319199	0.202719
332	GRIN1/GRIN2A	GRIN1		Inanobe 2005	F754A	Phe	Ala	754	TTC	FALSE	S2	5.89	0.770115			0.289431	0.319199	0.202719
333	GRIN1/GRIN2B	GRIN1		Kashiwagi 1997	W563L	Trp	Leu	563	TGG	TRUE	M1-M2	0.28	-0.552842			0.152076	0	0.00382135
334	GRIN1/GRIN2B	GRIN1		Kashiwagi 1997	W608L	Trp	Leu	608	TGG	TRUE	M2-M3	0.7	-0.154902			0.165842	0	0.00448916
341	GRIN1/GRIN2B	GRIN1		Kashiwagi 1997	Y647L	Tyr	Leu	647	TAC	FALSE	S2	0.33	-0.481486			0	0	0.00381985
342	GRIN1/GRIN2B	GRIN2B		Kashiwagi 1997	W559L	Trp	Leu	559	TGG	TRUE	M1	2.89	0.460898			0.243024	0	0.0114999
343	GRIN1/GRIN2B	GRIN2B		Kashiwagi 1997	W607L	Trp	Leu	607	TGG	TRUE	M2	2.48	0.394452			0.401493	0.246658	0.17962
344	GRIN1/GRIN2B	GRIN2B		Kashiwagi 1997	W610L	Trp	Leu	610	TGG	TRUE	M2	2.07	0.31597			0.335821	0.290515	0.231747
345	GRIN1/GRIN2B	GRIN2B		Kashiwagi 1997	N615Q	Asn	Gln	615	AAC	FALSE	M2	1.49	0.173186			0.120321	0.136453	0.0686703
346	GRIN1/GRIN2B	GRIN2B		Kashiwagi 1997	N616Q	Asn	Gln	616	AAC	FALSE	M2	1.17	0.0681859			0.119734	0.154448	0.0724742
347	GRIN1/GRIN2B	GRIN2B		Kashiwagi 1997	Y646L	Tyr	Leu	646	TAC	FALSE	M3	0.82	-0.0861861			0.511538	0	0.0151209
354	GRIN1/GRIN2A	GRIN2A		Low 2000	H42A	His	Ala	42	CAC	FALSE	ATD	5.7	0.755875			0.805926	0.756339	0.208603
355	GRIN1/GRIN2A	GRIN2A		Low 2000	H44G	His	Gly	44	CAC	FALSE	ATD	7.2	0.857332			0.829698	0.891333	0.101216
358	GRIN1/GRIN2A	GRIN2A		Low 2000	H128A	His	Ala	128	CAT	FALSE	ATD	4.5	0.653213			0.659524	0.886646	0.112972
363	GRIN1/GRIN2A	GRIN2A	human	Swanger 2016	p.Cys436Arg	Cys	Arg	436	TGT	TRUE	S1	2.3	0.361728			0.824471	0.548654	0.322965
364	GRIN1/GRIN2A	GRIN2A	human	Swanger 2016	p.Val452Met	Val	Met	452	GTG	TRUE	S1	1	0			0.988654	0.835056	0.212454
365	GRIN1/GRIN2A	GRIN2A	human	Swanger 2016	p.Gly483Arg	Gly	Arg	483	GGG	TRUE	S1	54	1.73239			0.469038	0.518058	0.305682
366	GRIN1/GRIN2A	GRIN2A	human	Swanger 2016	p.Arg504Trp	Arg	Trp	504	CGG	TRUE	S1	2.8	0.447158			0.405732	0.651825	0.353302
367	GRIN1/GRIN2A	GRIN2A	human	Swanger 2016	p.Val506Ala	Val	Ala	506	GTC	TRUE	S1	2	0.30103			0.528079	0.672924	0.388903
370	GRIN1/GRIN2A	GRIN2A	human	Swanger 2016	p.Lys669Asn	Lys	Asn	669	AAG	TRUE	S2	1.1	0.0413927			0.765714	0.758706	0.291069
371	GRIN1/GRIN2A	GRIN2A	human	Swanger 2016	p.Val685Gly	Val	Gly	685	GTG	TRUE	S2	270	2.43136			0.868293	0.188036	0.00345954
372	GRIN1/GRIN2A	GRIN2A	human	Swanger 2016	p.Ile694Thr	Ile	Thr	694	ATT	TRUE	S2	9.8	0.991226			0.629717	0.626171	0.395591
373	GRIN1/GRIN2A	GRIN2A	human	Swanger 2016	p.Pro699Ser	Pro	Ser	699	CCC	TRUE	S2	2.2	0.342423			0.415094	0.824074	0.20972
374	GRIN1/GRIN2A	GRIN2A	human	Swanger 2016	p.Met705Val	Met	Val	705	ATG	TRUE	S2	5.7	0.755875			0.466981	0.644231	0.398537
375	GRIN1/GRIN2A	GRIN2A	human	Swanger 2016	p.Glu714Lys	Glu	Lys	714	GAG	TRUE	S2	3	0.477121			0.504265	0.533469	0.2948
376	GRIN1/GRIN2A	GRIN2A	human	Swanger 2016	p.Ala716Thr	Ala	Thr	716	GCC	TRUE	S2	20	1.30103			0.454119	0.328431	0.0409477
377	GRIN1/GRIN2A	GRIN2A	human	Swanger 2016	p.Ala727Thr	Ala	Thr	727	GCT	TRUE	S2	5.1	0.70757			0.412562	0.406273	0.104158
378	GRIN1/GRIN2A	GRIN2A	human	Swanger 2016	p.Asp731Asn	Asp	Asn	731	GAT	TRUE	S2	6418	3.8074			0.490809	0.247864	0.0109024
379	GRIN1/GRIN2A	GRIN2A	human	Swanger 2016	p.Val734Leu	Val	Leu	734	GTC	TRUE	S2	5.1	0.70757			0.465952	0.235588	0.00360141
380	GRIN1/GRIN2A	GRIN2A	human	Swanger 2016	p.Lys772Glu	Lys	Glu	772	AAG	TRUE	S2	4.8	0.681241			0.534	0.534868	0.346406
381	GRIN1/GRIN2B	GRIN2B	human	Swanger 2016	p.Glu413Gly	Glu	Gly	413	GAG	TRUE	S1	79	1.89763			0.374051	0.0554167	0.0360167
383	GRIN1/GRIN2B	GRIN2B	human	Swanger 2016	p.Cys456Tyr	Cys	Tyr	456	TGC	TRUE	S1	0.39	-0.408935			0.583886	0.308685	0.252203
384	GRIN1/GRIN2B	GRIN2B	human	Swanger 2016	p.Cys461Phe	Cys	Phe	461	TGT	TRUE	S1	169	2.22789			0.41746	0.138154	0.0681624
385	GRIN1/GRIN2B	GRIN2B	human	Swanger 2016	p.Arg540His	Arg	His	540	CGC	TRUE	S1	0.64	-0.19382			0	0.306388	0.254516
386	GRIN1/GRIN2B	GRIN2B	human	Swanger 2016	p.Arg682Cys	Arg	Cys	682	CGC	TRUE	S2	0.91	-0.0409586			0	0.296235	0.252524
387	GRIN1/GRIN2B	GRIN2B	human	Swanger 2016	p.Arg696His	Arg	His	696	CGC	TRUE	S2	0.33	-0.481486			0.207562	0.35582	0.327907
388	GRIN1/GRIN2A	GRIN2A		Ren 2013	F636A	Phe	Ala	636	TTC	FALSE	M3	2.4228	0.384318	measured		0.18932	0	3.99901e-05
389	GRIN1/GRIN2A	GRIN2A		Ren 2013	F636C	Phe	Cys	636	TTC	TRUE	M3	5.2628	0.721217	measured		0.18932	0	3.99901e-05
390	GRIN1/GRIN2A	GRIN2A		Ren 2013	F636G	Phe	Gly	636	TTC	FALSE	M3	3.9095	0.592121	measured		0.18932	0	3.99901e-05
391	GRIN1/GRIN2A	GRIN2A		Ren 2013	F636I	Phe	Ile	636	TTC	TRUE	M3	0.6295	-0.201004	measured		0.18932	0	3.99901e-05
392	GRIN1/GRIN2A	GRIN2A		Ren 2013	F636L	Phe	Leu	636	TTC	TRUE	M3	4.7428	0.676035	measured		0.18932	0	3.99901e-05
393	GRIN1/GRIN2A	GRIN2A		Ren 2013	F636Q	Phe	Gln	636	TTC	FALSE	M3	2.9228	0.465799	measured		0.18932	0	3.99901e-05
394	GRIN1/GRIN2A	GRIN2A		Ren 2013	F636S	Phe	Ser	636	TTC	TRUE	M3	4.0561	0.608109	measured		0.18932	0	3.99901e-05
395	GRIN1/GRIN2A	GRIN2A		Ren 2013	F636V	Phe	Val	636	TTC	TRUE	M3	0.8428	-0.0742755	measured		0.18932	0	3.99901e-05
396	GRIN1/GRIN2A	GRIN2A		Ren 2013	F636W	Phe	Trp	636	TTC	FALSE	M3	0.5161	-0.287266	measured		0.18932	0	3.99901e-05
397	GRIN1/GRIN2A	GRIN2A		Ren 2013	F636Y	Phe	Tyr	636	TTC	TRUE	M3	0.8494	-0.0708877	measured		0.18932	0	3.99901e-05
398	GRIN1/GRIN2A	GRIN1		Wang 2018	K543A	Lys	Ala	543	AAG	FALSE	M1	1.1323	0.0539624	measured		0.260194	0.240215	0.0861739
399	GRIN1/GRIN2A	GRIN1		Wang 2018	K544A	Lys	Ala	544	AAG	FALSE	M1	1.28916	0.110307	measured		0.289105	0.268007	0.102769
400	GRIN1/GRIN2A	GRIN1		Wang 2018	E545A	Glu	Ala	545	GAG	TRUE	M1	0.949028	-0.022721	measured		0.289105	0.317192	0.174717
401	GRIN1/GRIN2A	GRIN1		Wang 2018	I546A	Ile	Ala	546	ATT	FALSE	M1	0.853574	-0.0687586	measured		0.289105	0.307349	0.186478
402	GRIN1/GRIN2A	GRIN1		Wang 2018	P547A	Pro	Ala	547	CCC	TRUE	M1	1.44197	0.158956	measured		0.263725	0.274971	0.0476925
403	GRIN1/GRIN2A	GRIN1		Wang 2018	R548A	Arg	Ala	548	CGG	FALSE	M1	0.5295	-0.276134	measured		0.260488	0.26253	0.0458844
404	GRIN1/GRIN2A	GRIN1		Wang 2018	S549A	Ser	Ala	549	AGC	FALSE	M1	0.291991	-0.534631	measured		0.264356	0.240976	0.0902704
405	GRIN1/GRIN2A	GRIN1		Wang 2018	T550A	Thr	Ala	550	ACG	TRUE	M1	1.47613	0.169125	measured		0.268	0.254545	0.104526
406	GRIN1/GRIN2A	GRIN1		Wang 2018	L551A	Leu	Ala	551	CTG	FALSE	M1	0.09255	-1.03362	measured		0.3	0.163095	0.0402568
407	GRIN1/GRIN2A	GRIN1		Wang 2018	D552A	Asp	Ala	552	GAC	TRUE	M1	3.18168	0.502657	measured		0.302624	0.282457	0.120608
408	GRIN1/GRIN2A	GRIN1		Wang 2018	S553A	Ser	Ala	553	TCG	TRUE	M1	0.0548892	-1.26051	measured		0.304153	0	0.00287727
409	GRIN1/GRIN2A	GRIN1		Wang 2018	F554A	Phe	Ala	554	TTC	FALSE	S1-M1	0.204017	-0.690334	measured		0.401207	0.12226	0.0181584
410	GRIN1/GRIN2A	GRIN1		Wang 2018	M555A	Met	Ala	555	ATG	FALSE	M1	1.89956	0.278653	measured		0.340909	0.304183	0.153583
411	GRIN1/GRIN2A	GRIN1		Wang 2018	Q556A	Gln	Ala	556	CAG	FALSE	M1	0.397897	-0.400229	measured		0.301508	0.300547	0.152045
412	GRIN1/GRIN2A	GRIN1		Wang 2018	P557A	Pro	Ala	557	CCG	TRUE	M1	0.12817	-0.892213	measured		0.27	0.162861	0.0475792
413	GRIN1/GRIN2A	GRIN1		Wang 2018	F558A	Phe	Ala	558	TTC	FALSE	M1	0.420287	-0.376454	measured		0.27	0.400462	0.281004
414	GRIN1/GRIN2A	GRIN1		Wang 2018	Q559A	Gln	Ala	559	CAG	FALSE	M1	1.43559	0.157032	measured		0.272362	0.392117	0.272953
415	GRIN1/GRIN2A	GRIN1		Wang 2018	S560A	Ser	Ala	560	AGC	FALSE	M1-M2	1.29079	0.110857	measured		0.24977	0.28436	0.135453
416	GRIN1/GRIN2A	GRIN1		Wang 2018	T561A	Thr	Ala	561	ACA	TRUE	M1-M2	1.20895	0.0824095	measured		0.248182	0.434295	0.325753
417	GRIN1/GRIN2A	GRIN1		Wang 2018	L562A	Leu	Ala	562	CTG	FALSE	M1	0.499235	-0.301695	measured		0.288347	0.145373	0.0259368
418	GRIN1/GRIN2A	GRIN1		Wang 2018	W563A	Trp	Ala	563	TGG	FALSE	M1-M2	0.250924	-0.600458	measured		0.152076	0.298515	0.149513
419	GRIN1/GRIN2A	GRIN1		Wang 2018	L564A	Leu	Ala	564	CTG	FALSE	M1-M2	1.35611	0.132295	measured		0	0.332405	0.18303
420	GRIN1/GRIN2A	GRIN1		Wang 2018	L565A	Leu	Ala	565	CTG	FALSE	M1-M2	1.80236	0.255841	measured		0	0.311881	0.150681
421	GRIN1/GRIN2A	GRIN1		Wang 2018	M641A	Met	Ala	641	ATG	FALSE	S2	0.891674	-0.0497939	measured		0.226368	0.190711	0.0433076
422	GRIN1/GRIN2A	GRIN1		Wang 2018	I642A	Ile	Ala	642	ATC	FALSE	S2	1.95505	0.291159	measured		0.229798	0.166871	0.0402729
423	GRIN1/GRIN2A	GRIN1		Wang 2018	I643A	Ile	Ala	643	ATC	FALSE	S2	0.643662	-0.191342	measured		0.229798	0.194286	0.0500921
424	GRIN1/GRIN2A	GRIN1		Wang 2018	V644A	Val	Ala	644	GTG	TRUE	S2	0.485832	-0.313514	measured		0.230318	0	0.00364862
425	GRIN1/GRIN2A	GRIN1		Wang 2018	A645L	Ala	Leu	645	GCC	FALSE	S2	0.215088	-0.667384	measured		0	0	0.00220935
426	GRIN1/GRIN2A	GRIN1		Wang 2018	S646A	Ser	Ala	646	TCC	TRUE	S2	1.14709	0.0595969	measured		0	0.193526	0.0483937
427	GRIN1/GRIN2A	GRIN1		Wang 2018	Y647A	Tyr	Ala	647	TAC	FALSE	S2	0.111265	-0.953642	measured		0	0	0.00191647
428	GRIN1/GRIN2A	GRIN1		Wang 2018	T648A	Thr	Ala	648	ACC	TRUE	S2	0.0877862	-1.05657	measured		0	0	0.00317397
430	GRIN1/GRIN2A	GRIN1		Wang 2018	N650A	Asn	Ala	650	AAC	FALSE	S2	0.253157	-0.59661	measured		0	0.0971429	0.0330393
431	GRIN1/GRIN2A	GRIN1		Wang 2018	L651A	Leu	Ala	651	CTG	FALSE	S2	0.0871221	-1.05987	measured		0	0	0.0027032
432	GRIN1/GRIN2A	GRIN1		Wang 2018	A652L	Ala	Leu	652	GCG	FALSE	S2	0.126158	-0.899084	measured		0	0	0.00284152
433	GRIN1/GRIN2A	GRIN1		Wang 2018	A653L	Ala	Leu	653	GCC	FALSE	S2	0.0980676	-1.00847	measured		0	0	0.00195902
434	GRIN1/GRIN2A	GRIN1		Wang 2018	F654A	Phe	Ala	654	TTC	FALSE	S2	0.112042	-0.950618	measured		0	0.280307	0.125431
435	GRIN1/GRIN2A	GRIN1		Wang 2018	L655A	Leu	Ala	655	CTG	FALSE	S2	0.719046	-0.143243	measured		0	0.146929	0.0308363
436	GRIN1/GRIN2A	GRIN1		Wang 2018	V656A	Val	Ala	656	GTG	TRUE	M3	0.155214	-0.80907	measured		0.335396	0.526293	0.39675
437	GRIN1/GRIN2A	GRIN1		Wang 2018	L657A	Leu	Ala	657	CTG	FALSE	S2	0.0702553	-1.15332	measured		0	0.155515	0.0310783
438	GRIN1/GRIN2A	GRIN1		Wang 2018	D658A	Asp	Ala	658	GAC	TRUE	S2	0.779965	-0.107925	measured		0	0.243316	0.0988554
439	GRIN1/GRIN2A	GRIN1		Wang 2018	R659A	Arg	Ala	659	CGG	FALSE	S2	0.260635	-0.583967	measured		0	0.259649	0.111693
440	GRIN1/GRIN2A	GRIN1		Wang 2018	P660A	Pro	Ala	660	CCG	TRUE	S2	2.28296	0.358497	measured		0	0.505911	0.38962
441	GRIN1/GRIN2A	GRIN1		Wang 2018	E661A	Glu	Ala	661	GAG	TRUE	S2	0.268419	-0.571186	measured		0	0.233766	0.0745661
442	GRIN1/GRIN2A	GRIN2A		Wang 2018	F636A	Phe	Ala	636	TTC	FALSE	M3	1.33905	0.126798	measured		0.18932	0	3.99901e-05
443	GRIN1/GRIN2A	GRIN2A		Wang 2018	F637A	Phe	Ala	637	TTC	FALSE	M3	2.28223	0.35836	measured		0.18932	0.280711	0.0266561
444	GRIN1/GRIN2A	GRIN2A		Wang 2018	A638L	Ala	Leu	638	GCT	FALSE	M3	0.0739506	-1.13106	measured		0.186603	0	2.67147e-05
445	GRIN1/GRIN2A	GRIN2A		Wang 2018	V639A	Val	Ala	639	GTC	TRUE	M3	1.8138	0.258589	measured		0.187286	0	5.39381e-05
446	GRIN1/GRIN2A	GRIN2A		Wang 2018	I640A	Ile	Ala	640	ATA	FALSE	M3	0.427936	-0.368621	measured		0.216667	0	3.76075e-05
447	GRIN1/GRIN2A	GRIN2A		Wang 2018	F641A	Phe	Ala	641	TTC	FALSE	M3	1.22513	0.0881814	measured		0.21485	0	3.16128e-05
448	GRIN1/GRIN2A	GRIN2A		Wang 2018	L642A	Leu	Ala	642	CTG	FALSE	M3	0.318235	-0.497251	measured		0.21305	0	2.12219e-05
450	GRIN1/GRIN2A	GRIN2A		Wang 2018	S644A	Ser	Ala	644	AGC	FALSE	M3	0.1981	-0.703115	measured		0.21485	0	6.3872e-05
451	GRIN1/GRIN2A	GRIN2A		Wang 2018	Y645A	Tyr	Ala	645	TAC	FALSE	M3	0.289049	-0.539029	measured		0.213836	0	2.64052e-05
452	GRIN1/GRIN2A	GRIN2A		Wang 2018	T646A	Thr	Ala	646	ACA	TRUE	M3	0.0723535	-1.14054	measured		0	0	3.63702e-05
453	GRIN1/GRIN2A	GRIN2A		Wang 2018	A647L	Ala	Leu	647	GCC	FALSE	M3	0.0647475	-1.18878	measured		0	0	3.11187e-05
454	GRIN1/GRIN2A	GRIN2A		Wang 2018	N648A	Asn	Ala	648	AAT	FALSE	M3	0.563024	-0.249473	measured		0	0	4.14707e-05
455	GRIN1/GRIN2A	GRIN2A		Wang 2018	L649A	Leu	Ala	649	CTG	FALSE	M3	0.409392	-0.387861	measured		0	0	4.26542e-05
456	GRIN1/GRIN2A	GRIN2A		Wang 2018	A650L	Ala	Leu	650	GCT	FALSE	M3	0.234866	-0.62918	measured		0	0	3.22109e-05
457	GRIN1/GRIN2A	GRIN2A		Wang 2018	A651L	Ala	Leu	651	GCC	FALSE	M3	0.400297	-0.397618	measured		0	0	3.41752e-05
458	GRIN1/GRIN2A	GRIN2A		Wang 2018	F652A	Phe	Ala	652	TTC	FALSE	M3	0.652686	-0.185295	measured		0	0.0846875	0.00100456
459	GRIN1/GRIN2A	GRIN2A		Wang 2018	M653A	Met	Ala	653	ATG	FALSE	M3	0.264373	-0.577783	measured		0	0	2.74778e-05
460	GRIN1/GRIN2A	GRIN2A		Wang 2018	I654A	Ile	Ala	654	ATC	FALSE	M3	0.0844886	-1.0732	measured		0	0	1.99246e-05
461	GRIN1/GRIN2A	GRIN2A		Wang 2018	Q655A	Gln	Ala	655	CAA	FALSE	M3-S2	0.762396	-0.11782	measured		0	0	4.25626e-05
462	GRIN1/GRIN2A	GRIN2A		Wang 2018	E656A	Glu	Ala	656	GAG	TRUE	M3-S2	0.105504	-0.976729	measured		0.181087	0.163462	0.0014415
463	GRIN1/GRIN2A	GRIN2A		Wang 2018	E657A	Glu	Ala	657	GAA	TRUE	M3-S2	1.01777	0.00765002	measured		0.182126	0.128098	0.00115656
491	GRIN1/GRIN2A	GRIN1		Furukawa 2005	N521Y	Asn	Tyr	521	AAC	TRUE	S1	4.35	0.638489			0.546939	0.577242	0.377704
492	GRIN1/GRIN2A	GRIN2A		Furukawa 2005	E516Y	Glu	Tyr	516	GAG	FALSE	S1	4.05	0.607455			0.414849	0.343741	0.113421
520	GRIN1/GRIN2B	GRIN1		Kashiwagi 1996	D669N	Asp	Asn	669	GAC	TRUE	S2	0.9	-0.0457575			0	0.130769	0.042045
521	GRIN1/GRIN2B	GRIN1		Kashiwagi 1996	D669A	Asp	Ala	669	GAC	TRUE	S2	3.9	0.591065			0	0.130769	0.042045
522	GRIN1/GRIN2B	GRIN1		Kashiwagi 1996	D669E	Asp	Glu	669	GAC	TRUE	S2	2.5	0.39794			0	0.130769	0.042045
562	GRIN1/GRIN2B	GRIN1		Williams 1995	E339Q	Glu	Gln	339	GAG	TRUE	ATD	1.9	0.278754			0.81732	0.725074	0.198247
563	GRIN1/GRIN2B	GRIN1		Williams 1995	E342Q	Glu	Gln	342	GAG	TRUE	ATD	2.2	0.342423			0.87553	0.656098	0.287744
564	GRIN1/GRIN2B	GRIN1		Williams 1995	E342A	Glu	Ala	342	GAG	TRUE	ATD	2.1	0.322219			0.87553	0.656098	0.287744
565	GRIN1/GRIN2B	GRIN1		Williams 1995	D345N	Asp	Asn	345	GAC	TRUE	ATD	1.3	0.113943			0.887324	0.691985	0.248218
569	GRIN1/GRIN2B	GRIN2B		Williams 1998	W607L	Trp	Leu	607	TGG	TRUE	M2	2.5	0.39794			0.401493	0.246658	0.17962
570	GRIN1/GRIN2B	GRIN2B		Williams 1998	W607N	Trp	Asn	607	TGG	FALSE	M2	2.7	0.431364			0.401493	0.246658	0.17962
571	GRIN1/GRIN2B	GRIN2B		Williams 1998	W607A	Trp	Ala	607	TGG	FALSE	M2	2	0.30103			0.401493	0.246658	0.17962
572	GRIN1/GRIN2B	GRIN2B		Williams 1998	W607Y	Trp	Tyr	607	TGG	FALSE	M2	1.8	0.255273			0.401493	0.246658	0.17962
573	GRIN1/GRIN2B	GRIN2B		Williams 1998	W607F	Trp	Phe	607	TGG	FALSE	M2	1.6	0.20412			0.401493	0.246658	0.17962
584	GRIN1/GRIN2A	GRIN2A		Addis 2017	P79R	Pro	Arg	79	CCC	TRUE	ATD	1.45	0.161368	calcium imaging		0.883634	0.620372	0.36171
585	GRIN1/GRIN2A	GRIN2A		Addis 2017	C231Y	Cys	Tyr	231	TGT	TRUE	ATD	1.89	0.276462	calcium imaging		0.698413	0.622222	0.392889
586	GRIN1/GRIN2A	GRIN2A		Addis 2017	G483R	Gly	Arg	483	GGG	TRUE	S1	11.3	1.05308	calcium imaging		0.469038	0.518058	0.305682
587	GRIN1/GRIN2A	GRIN2A		Addis 2017	M705V	Met	Val	705	ATG	TRUE	S2	0.89	-0.05061	calcium imaging		0.466981	0.644231	0.398537
588	GRIN1/GRIN2A	GRIN2A		Addis 2017	E714K	Glu	Lys	714	GAG	TRUE	S2	0.41	-0.387216	calcium imaging		0.504265	0.533469	0.2948
589	GRIN1/GRIN2A	GRIN2A		Addis 2017	I814T	Ile	Thr	814	ATT	TRUE	S2-M4	0.42	-0.376751	calcium imaging		0.410256	0.495651	0.170491
592	GRIN1/GRIN2A	GRIN2A		Anson 1998	N482A	Asn	Ala	482	AAT	FALSE	S1	17.9	1.25285		463	0.451449	0.586098	0.364043
593	GRIN1/GRIN2A	GRIN2A		Anson 1998	K484E	Lys	Glu	484	AAG	TRUE	S1	29.3	1.46687		465	0.487179	0.240639	0.00724773
594	GRIN1/GRIN2A	GRIN2A		Anson 1998	H485A	His	Ala	485	CAT	FALSE	S1	624	2.79518		466	0.489011	0.170122	0.0029627
595	GRIN1/GRIN2A	GRIN2A		Anson 1998	H485F	His	Phe	485	CAT	FALSE	S1	38.4	1.58433		466	0.489011	0.170122	0.0029627
596	GRIN1/GRIN2A	GRIN2A		Anson 1998	G683A	Gly	Ala	683	GGG	TRUE	S2	2.08	0.318063		664	0.859903	0.533175	0.34665
597	GRIN1/GRIN2A	GRIN2A		Anson 1998	T684A	Thr	Ala	684	ACA	TRUE	S2	19	1.27875		665	0.867314	0.382904	0.0908926
598	GRIN1/GRIN2A	GRIN2A		Anson 1998	V685A	Val	Ala	685	GTG	TRUE	S2	33.4	1.52375		666	0.868293	0.188036	0.00345954
599	GRIN1/GRIN2A	GRIN2A		Anson 1998	G688A	Gly	Ala	688	GGA	TRUE	S2	927	2.96708		669	0.858974	0.109888	0.00062135
600	GRIN1/GRIN2A	GRIN2A		Anson 1998	S689A	Ser	Ala	689	AGC	FALSE	S2	4.97	0.696356		670	0.822115	0.0910766	0.000462938
601	GRIN1/GRIN2A	GRIN2A		Anson 1998	T690A	Thr	Ala	690	ACG	TRUE	S2	2967	3.47232		671	0.783217	0.132752	0.000287533
602	GRIN1/GRIN2A	GRIN1	human	Ogden 2017	D552E	Asp	Glu	552	GAC	TRUE	M1	17	1.23045			0.302624	0.282457	0.120608
603	GRIN1/GRIN2A	GRIN1	human	Ogden 2017	P557R	Pro	Arg	557	CCG	TRUE	M1	0.33	-0.481486			0.27	0.162861	0.0475792
604	GRIN1/GRIN2A	GRIN2A	human	Ogden 2017	A548T	Ala	Thr	548	GCT	TRUE	S1-M1	17	1.23045			0.327295	0.368587	0.0605734
605	GRIN1/GRIN2B	GRIN1	human	Ogden 2017	D552E	Asp	Glu	552	GAC	TRUE	M1	3.3	0.518514			0.302624	0.141888	0.0405173
606	GRIN1/GRIN2B	GRIN1	human	Ogden 2017	P557R	Pro	Arg	557	CCG	TRUE	M1	0.09	-1.04576			0.27	0	0.00461435
607	GRIN1/GRIN2A	GRIN2A	human	Ogden 2017	P552R	Pro	Arg	552	CCA	TRUE	S1-M1	0.37	-0.431798			0.362299	0	4.84271e-05
608	GRIN1/GRIN2A	GRIN2A	human	Ogden 2017	P552Q	Pro	Gln	552	CCA	TRUE	S1-M1	3.1	0.491362			0.362299	0	4.84271e-05
609	GRIN1/GRIN2A	GRIN2A	human	Ogden 2017	P552K	Pro	Lys	552	CCA	FALSE	S1-M1	0.66	-0.180456			0.362299	0	4.84271e-05
610	GRIN1/GRIN2A	GRIN2A	human	Ogden 2017	P552G	Pro	Gly	552	CCA	FALSE	S1-M1	8.2	0.913814			0.362299	0	4.84271e-05
611	GRIN1/GRIN2A	GRIN2A	human	Ogden 2017	P552A	Pro	Ala	552	CCA	TRUE	S1-M1	6.9	0.838849			0.362299	0	4.84271e-05
612	GRIN1/GRIN2A	GRIN2A	human	Ogden 2017	P552I	Pro	Ile	552	CCA	FALSE	S1-M1	13	1.11394			0.362299	0	4.84271e-05
613	GRIN1/GRIN2A	GRIN2A	human	Ogden 2017	P552L	Pro	Leu	552	CCA	TRUE	S1-M1	2.4	0.380211			0.362299	0	4.84271e-05
614	GRIN1/GRIN2A	GRIN2A	human	Chen 2017	M817V	Met	Val	817	ATG	TRUE	M4	0.39	-0.408935			0.524874	0.546926	0.323308
617	GRIN1/GRIN2A	GRIN2A		Li 2019	L611Q	Leu	Gln	611	CTG	TRUE	M2	2.5	0.39794			0.404478	0.108831	0.000670261
618	GRIN1/GRIN2A	GRIN2A		Li 2019	N614S	Asn	Ser	614	AAT	TRUE	M2	2.6	0.414973			0.292683	0	3.73166e-05
619	GRIN1/GRIN2A	GRIN2A		Li 2019	N615K	Asn	Lys	615	AAC	TRUE	M2	2.8	0.447158			0.393204	0.0993999	0.000510735
622	GRIN1/GRIN2B	GRIN2B		Li 2019	W607C	Trp	Cys	607	TGG	TRUE	M2	2	0.30103			0.401493	0.246658	0.17962
623	GRIN1/GRIN2B	GRIN2B		Li 2019	G611V	Gly	Val	611	GGT	TRUE	M2	1.7	0.230449			0.244233	0.191419	0.130737
624	GRIN1/GRIN2B	GRIN2B		Li 2019	N615I	Asn	Ile	615	AAC	TRUE	M2	1.4	0.146128			0.120321	0.136453	0.0686703
625	GRIN1/GRIN2B	GRIN2B		Li 2019	N615K	Asn	Lys	615	AAC	TRUE	M2	1.3	0.113943			0.120321	0.136453	0.0686703
626	GRIN1/GRIN2B	GRIN2B		Li 2019	N616K	Asn	Lys	616	AAC	TRUE	M2	1.1	0.0413927			0.119734	0.154448	0.0724742
627	GRIN1/GRIN2B	GRIN2B		Li 2019	V618G	Val	Gly	618	GTA	TRUE	M2	1.6	0.20412			0.147415	0	0.0114648
628	GRIN1/GRIN2B	GRIN2B		Li 2019	V620M	Val	Met	620	GTG	TRUE	M2	1.1	0.0413927			0	0.19598	0.120752
629	GRIN1/GRIN2A	GRIN2A	human	Yuan 2014	L812M	Leu	Met	812	CTG	TRUE	S2-M4	0.41	-0.387216			0.366972	0.370879	0.0781296
630	GRIN1/GRIN2A	GRIN1	human	Yuan 2014	L808M	Leu	Met	808	CTT	FALSE	M4	0.39	-0.408935			0.147425	0	0.00289779
631	GRIN1/GRIN2A	GRIN2A	human	Yuan 2014	L812G	Leu	Gly	812	CTG	FALSE	S2-M4	1.4	0.146128			0.366972	0.370879	0.0781296
632	GRIN1/GRIN2A	GRIN2A	human	Yuan 2014	L812S	Leu	Ser	812	CTG	FALSE	S2-M4	0.31	-0.508638			0.366972	0.370879	0.0781296
633	GRIN1/GRIN2A	GRIN2A	human	Yuan 2014	L812C	Leu	Cys	812	CTG	FALSE	S2-M4	1.1	0.0413927			0.366972	0.370879	0.0781296
634	GRIN1/GRIN2A	GRIN2A	human	Yuan 2014	L812A	Leu	Ala	812	CTG	FALSE	S2-M4	0.68	-0.167491			0.366972	0.370879	0.0781296
635	GRIN1/GRIN2A	GRIN2A	human	Yuan 2014	L812Q	Leu	Gln	812	CTG	TRUE	S2-M4	0.67	-0.173925			0.366972	0.370879	0.0781296
636	GRIN1/GRIN2A	GRIN2A	human	Yuan 2014	L812E	Leu	Glu	812	CTG	FALSE	S2-M4	0.9	-0.0457575			0.366972	0.370879	0.0781296
637	GRIN1/GRIN2A	GRIN2A		McDaniel 2020	L550A	Leu	Ala	550	CTA	FALSE	S1-M1	6.6	0.819544			0.39466	0.462099	0.200387
638	GRIN1/GRIN2A	GRIN2A		McDaniel 2020	E551A	Glu	Ala	551	GAA	TRUE	S1-M1	4.8	0.681241			0.358782	0.159169	0.00254977
639	GRIN1/GRIN2A	GRIN2A		McDaniel 2020	P552A	Pro	Ala	552	CCA	TRUE	S1-M1	6.4	0.80618			0.362299	0	4.84271e-05
640	GRIN1/GRIN2A	GRIN2A		McDaniel 2020	F553A	Phe	Ala	553	TTC	FALSE	S1-M1	0.34	-0.468521			0.44281	0	4.16941e-05
641	GRIN1/GRIN2A	GRIN2A		McDaniel 2020	A555P	Ala	Pro	555	GCC	TRUE	S1-M1	5.4	0.732394			0.443366	0.252778	0.013893
642	GRIN1/GRIN2A	GRIN2A		McDaniel 2020	F553Y	Phe	Tyr	553	TTC	TRUE	S1-M1	3.6	0.556303			0.44281	0	4.16941e-05
655	GRIN1/GRIN2A	GRIN2A		Fayyazuddin 2000	H44A	His	Ala	44	CAC	FALSE	ATD	4.4	0.643453			0.829698	0.891333	0.101216
656	GRIN1/GRIN2A	GRIN2A		Fayyazuddin 2000	H128S	His	Ser	128	CAT	FALSE	ATD	3.8	0.579784			0.659524	0.886646	0.112972
657	GRIN1/GRIN2A	GRIN2A		Fayyazuddin 2000	K233R	Lys	Arg	233	AAA	TRUE	ATD	6	0.778151			0.643261	0.811123	0.213348
659	GRIN1/GRIN2A	GRIN2A		Fayyazuddin 2000	E266A	Glu	Ala	266	GAG	TRUE	ATD	5.9	0.770852			0.526108	0.732571	0.331115
666	GRIN1/GRIN2A	GRIN2A		Fayyazuddin 2000	R244G	Arg	Gly	244	CGC	TRUE	ATD	3.7	0.568202			0.604371	0.564604	0.25382
669	GRIN1/GRIN2B	GRIN2B		Laube 2004	E413A	Glu	Ala	413	GAG	TRUE	S1	355	2.55023			0.374051	0.0554167	0.0360167
670	GRIN1/GRIN2B	GRIN2B		Laube 2004	K485E	Lys	Glu	485	AAG	TRUE	S1	270	2.43136			0.213366	0	0.0111318
671	GRIN1/GRIN2B	GRIN2B		Laube 2004	H486A	His	Ala	486	CAT	FALSE	S1	703	2.84696			0.21521	0	0.011829
672	GRIN1/GRIN2B	GRIN2B		Laube 2004	K488A	Lys	Ala	488	AAG	FALSE	S1	87	1.93952			0.318182	0.212194	0.149507
673	GRIN1/GRIN2B	GRIN2B		Laube 2004	K489A	Lys	Ala	489	AAA	FALSE	S1	11	1.04139			0.318182	0.199713	0.131498
674	GRIN1/GRIN2B	GRIN2B		Laube 2004	S512A	Ser	Ala	512	TCA	TRUE	S1	65	1.81291			0.146141	0	0.0111884
675	GRIN1/GRIN2B	GRIN2B		Laube 2004	T514A	Thr	Ala	514	ACC	TRUE	S1	824	2.91593			0.147595	0	0.0126742
676	GRIN1/GRIN2B	GRIN2B		Laube 2004	E518A	Glu	Ala	518	GAA	TRUE	S1	14	1.14613			0.146689	0.145047	0.0786086
677	GRIN1/GRIN2B	GRIN2B		Laube 2004	V686A	Val	Ala	686	GTG	TRUE	S2	27	1.43136			0.183673	0.115995	0.0554326
678	GRIN1/GRIN2B	GRIN2B		Laube 2004	N688A	Asn	Ala	688	AAC	FALSE	S2	79	1.89763			0.182615	0.162621	0.109559
679	GRIN1/GRIN2B	GRIN2B		Laube 2004	S690G	Ser	Gly	690	AGC	TRUE	S2	177	2.24797			0.212264	0	0.011242
680	GRIN1/GRIN2B	GRIN2B		Laube 2004	T691A	Thr	Ala	691	ACA	TRUE	S2	743	2.87099			0.211268	0	0.0134312
681	GRIN1/GRIN2B	GRIN2B		Laube 2004	V714A	Val	Ala	714	GTA	TRUE	S2	59	1.77085			0.384689	0.1467	0.0773089
682	GRIN1/GRIN2B	GRIN2B		Laube 2004	Y731A	Tyr	Ala	731	TAT	FALSE	S2	631	2.80003			0.265025	0	0.0147019
683	GRIN1/GRIN2B	GRIN2B		Laube 2004	V735A	Val	Ala	735	GTG	TRUE	S2	41	1.61278			0.243329	0	0.0106719
684	GRIN1/GRIN2B	GRIN2B		Laube 2004	V735M	Val	Met	735	GTG	TRUE	S2	11	1.04139			0.243329	0	0.0106719
685	GRIN1/GRIN2B	GRIN2B		Laube 2004	Y762A	Tyr	Ala	762	TAT	FALSE	S2	2860	3.45637			0.203865	0	0.0132988
686	GRIN1/GRIN2B	GRIN1		Bledsoe 2017	N532A	Asn	Ala	532	AAG	FALSE	S1-M1	1.31	0.117271			0.200603	0.366423	0.279915
687	GRIN1/GRIN2B	GRIN1		Bledsoe 2017	N521D	Asn	Asp	521	AAC	FALSE	S1	3.49	0.542825			0.546939	0.216019	0.0869081
688	GRIN1/GRIN2B	GRIN1		Bledsoe 2017	K531A	Lys	Ala	531	AAC	TRUE	S1	1.66	0.220108			0.546939	0.216019	0.0869081
689	GRIN1/GRIN2B	GRIN1		Bledsoe 2017	Y535A	Tyr	Ala	535	TAC	FALSE	S1-M1	2.43	0.385606			0.43252	0	0.00522781
690	GRIN1/GRIN2B	GRIN1		Bledsoe 2017	E781A	Glu	Ala	781	GAG	TRUE	S2-M4	5.38	0.730782			0.422222	0	0.00448117
713	GRIN1/GRIN2A	GRIN1		Skrenkova 2020	S688Y	Ser	Tyr	688	TCC	TRUE	S2	62.29	1.79442			0.256731	0.240861	0.102601
714	GRIN1/GRIN2B	GRIN1		Skrenkova 2020	S688Y	Ser	Tyr	688	TCC	TRUE	S2	19.18	1.28285			0.256731	0.210667	0.1024
715	GRIN1/GRIN2A	GRIN1		Kuryatov 1994	T402A	Thr	Ala	402	ACG	TRUE	S1	2.7	0.431364		384	0.438944	0.485437	0.393315
716	GRIN1/GRIN2B	GRIN1		Kuryatov 1994	Q405K	Gln	Lys	405	CAG	TRUE	S1	19.8	1.29667		387	0.468832	0.357049	0.249612
717	GRIN1/GRIN2B	GRIN1		Kuryatov 1994	P407A	Pro	Ala	407	CCC	TRUE	S1	2.2	0.342423		389	0.32439	0.366841	0.308408
718	GRIN1/GRIN2B	GRIN1		Kuryatov 1994	F408A	Phe	Ala	408	TTC	FALSE	S1	3	0.477121		390	0.324029	0.449182	0.391398
719	GRIN1/GRIN2B	GRIN1		Kuryatov 1994	F408S	Phe	Ser	408	TTC	TRUE	S1	1.6	0.20412		390	0.324029	0.449182	0.391398
720	GRIN1/GRIN2B	GRIN1		Kuryatov 1994	F408T	Phe	Thr	408	TTC	FALSE	S1	2.9	0.462398		390	0.324029	0.449182	0.391398
721	GRIN1/GRIN2B	GRIN1		Kuryatov 1994	F408W	Phe	Trp	408	TTC	FALSE	S1	2.7	0.431364		390	0.324029	0.449182	0.391398
722	GRIN1/GRIN2B	GRIN1		Kuryatov 1994	F408Y	Phe	Tyr	408	TTC	TRUE	S1	3.5	0.544068		390	0.324029	0.449182	0.391398
723	GRIN1/GRIN2B	GRIN1		Kuryatov 1994	Y410A	Tyr	Ala	410	TAC	FALSE	S1	2.7	0.431364		392	0.410539	0.494612	0.396534
724	GRIN1/GRIN2B	GRIN1		Kuryatov 1994	Y456E	Tyr	Glu	456	TAC	FALSE	S1	2.1	0.322219		438	0.966132	0.600911	0.348145
725	GRIN1/GRIN2B	GRIN1		Kuryatov 1994	F458A	Phe	Ala	458	TTT	FALSE	S1	2	0.30103		440	0.966132	0.361186	0.262926
726	GRIN1/GRIN2B	GRIN1		Kuryatov 1994	F458H	Phe	His	458	TTT	FALSE	S1	3	0.477121		440	0.966132	0.361186	0.262926
727	GRIN1/GRIN2B	GRIN1		Kuryatov 1994	F458Y	Phe	Tyr	458	TTT	TRUE	S1	2.8	0.447158		440	0.966132	0.361186	0.262926
728	GRIN1/GRIN2B	GRIN1		Kuryatov 1994	K465H	Lys	His	465	AAG	FALSE	S1	4.5	0.653213		447	0.713528	0.640221	0.358002
729	GRIN1/GRIN2B	GRIN1		Kuryatov 1994	K465Q	Lys	Gln	465	AAG	TRUE	S1	1.9	0.278754		447	0.713528	0.640221	0.358002
730	GRIN1/GRIN2B	GRIN1		Kuryatov 1994	K465R	Lys	Arg	465	AAG	TRUE	S1	3.1	0.491362		447	0.713528	0.640221	0.358002
731	GRIN1/GRIN2B	GRIN1		Kuryatov 1994	F472S	Phe	Ser	472	TTC	TRUE	S1	3.6	0.556303		454	0.507842	0.648325	0.296238
732	GRIN1/GRIN2B	GRIN1		Kuryatov 1994	Y474A	Tyr	Ala	474	TAC	FALSE	S1	6.1	0.78533		456	0.44281	0.553008	0.358535
733	GRIN1/GRIN2B	GRIN1		Kuryatov 1994	H477E	His	Glu	477	CAC	FALSE	S1	2.1	0.322219		459	0.266667	0.528915	0.396305
734	GRIN1/GRIN2B	GRIN1		Kuryatov 1994	H477Q	His	Gln	477	CAC	TRUE	S1	9.2	0.963788		459	0.266667	0.528915	0.396305
735	GRIN1/GRIN2B	GRIN1		Kuryatov 1994	D481K	Asp	Lys	481	GAT	FALSE	S1	2.9	0.462398		463	0.25933	0.504808	0.397789
736	GRIN1/GRIN2B	GRIN1		Kuryatov 1994	D481N	Asp	Asn	481	GAT	TRUE	S1	3.5	0.544068		463	0.25933	0.504808	0.397789
737	GRIN1/GRIN2B	GRIN1		Kuryatov 1994	K483E	Lys	Glu	483	AAG	TRUE	S1	7.2	0.857332		465	0.280922	0.401318	0.348823
738	GRIN1/GRIN2B	GRIN1		Kuryatov 1994	K483Q	Lys	Gln	483	AAG	TRUE	S1	2.8	0.447158		465	0.280922	0.401318	0.348823
739	GRIN1/GRIN2B	GRIN1		Kuryatov 1994	K483R	Lys	Arg	483	AAG	TRUE	S1	2.2	0.342423		465	0.280922	0.401318	0.348823
740	GRIN1/GRIN2B	GRIN1		Kuryatov 1994	F484A	Phe	Ala	484	TTC	FALSE	S1	15.5	1.19033		466	0.277003	0.162322	0.0534552
741	GRIN1/GRIN2B	GRIN1		Kuryatov 1994	F484H	Phe	His	484	TTC	FALSE	S1	5.1	0.70757		466	0.277003	0.162322	0.0534552
742	GRIN1/GRIN2B	GRIN1		Kuryatov 1994	F484Y	Phe	Tyr	484	TTC	TRUE	S1	4.1	0.612784		466	0.277003	0.162322	0.0534552
743	GRIN1/GRIN2B	GRIN1		Kuryatov 1994	M512I	Met	Ile	512	ATG	TRUE	S1	3.5	0.544068		494	0.587808	0.513763	0.381031
744	GRIN1/GRIN2B	GRIN1		Kuryatov 1994	N520T	Asn	Thr	520	AAT	TRUE	S1	4.1	0.612784		502	0.825688	0.669051	0.267031
745	GRIN1/GRIN2B	GRIN1		Kuryatov 1994	Y535S	Tyr	Ser	535	TAC	TRUE	S1-M1	2.6	0.414973		517	0.43252	0	0.00522781
746	GRIN1/GRIN2A	GRIN1		Kuryatov 1994	V542A	Val	Ala	542	GTC	TRUE	M1	6	0.778151		524	0.261463	0.155551	0.0341681
747	GRIN1/GRIN2B	GRIN1		Kuryatov 1994	V542I	Val	Ile	542	GTC	TRUE	M1	4	0.60206		524	0.261463	0.173223	0.0545023
748	GRIN1/GRIN2B	GRIN1		Kuryatov 1994	F679S	Phe	Ser	679	TTT	TRUE	S2	2.5	0.39794		661	0.239188	0.159038	0.0444383
749	GRIN1/GRIN2B	GRIN1		Kuryatov 1994	Y681A	Tyr	Ala	681	TAC	FALSE	S2	3.5	0.544068		663	0.291262	0.115237	0.0328504
750	GRIN1/GRIN2B	GRIN1		Kuryatov 1994	V684A	Val	Ala	684	GTG	TRUE	S2	1.9	0.278754		666	0.265025	0.210485	0.0784275
751	GRIN1/GRIN2B	GRIN1		Kuryatov 1994	S687G	Ser	Gly	687	AGC	TRUE	S2	1.7	0.230449		669	0.288782	0.275316	0.150014
752	GRIN1/GRIN2B	GRIN1		Kuryatov 1994	S688A	Ser	Ala	688	TCC	TRUE	S2	2.9	0.462398		670	0.256731	0.210667	0.1024
753	GRIN1/GRIN2B	GRIN1		Kuryatov 1994	W731A	Trp	Ala	731	TGG	FALSE	S2	2.3	0.361728		703	0.258252	0	0.00332991
754	GRIN1/GRIN2B	GRIN1		Kuryatov 1994	D732A	Asp	Ala	732	GAC	TRUE	S2	1.8	0.255273		704	0.236807	0	0.00571464
755	GRIN1/GRIN2A	GRIN2A		Maier 2007	E413A	Glu	Ala	413	GAG	TRUE	S1	40	1.60206	Kd for Glu	394	0.508294	0.228721	0.00657544
756	GRIN1/GRIN2A	GRIN2A		Maier 2007	K484E	Lys	Glu	484	AAG	TRUE	S1	30	1.47712	Kd for Glu	465	0.487179	0.240639	0.00724773
757	GRIN1/GRIN2A	GRIN2A		Maier 2007	K484N	Lys	Asn	484	AAG	TRUE	S1	4.7	0.672098	Kd for Glu	465	0.487179	0.240639	0.00724773
758	GRIN1/GRIN2A	GRIN2A		Maier 2007	H485A	His	Ala	485	CAT	FALSE	S1	140	2.14613	Kd for Glu	466	0.489011	0.170122	0.0029627
759	GRIN1/GRIN2A	GRIN2A		Maier 2007	T513N	Thr	Asn	513	ACC	TRUE	S1	6.2	0.792392	Kd for Glu	494	0.481521	0.0916036	0.000434432
760	GRIN1/GRIN2A	GRIN2A		Maier 2007	N687K	Asn	Lys	687	AAT	TRUE	S2	14	1.14613	Kd for Glu	668	0.863124	0.21732	0.00794773
761	GRIN1/GRIN2A	GRIN2A		Maier 2007	N687D	Asn	Asp	687	AAT	TRUE	S2	2.4	0.380211	Kd for Glu	668	0.863124	0.21732	0.00794773
762	GRIN1/GRIN2B	GRIN1		Hirai 1996	F753A	Phe	Ala	753	TTT	FALSE	S2	5.1	0.70757			0.273889	0.107769	0.027891
763	GRIN1/GRIN2B	GRIN1		Hirai 1996	F753S	Phe	Ser	753	TTT	TRUE	S2	6.5	0.812913			0.273889	0.107769	0.027891
764	GRIN1/GRIN2B	GRIN1		Hirai 1996	F754A	Phe	Ala	754	TTC	FALSE	S2	3.4	0.531479			0.289431	0.126289	0.0359249
765	GRIN1/GRIN2B	GRIN1		Hirai 1996	F754S	Phe	Ser	754	TTC	TRUE	S2	2	0.30103			0.289431	0.126289	0.0359249
766	GRIN1/GRIN2B	GRIN1		Hirai 1996	F758A	Phe	Ala	758	TTC	FALSE	S2	10	1			0.389855	0.108015	0.0245384
767	GRIN1/GRIN2B	GRIN1		Hirai 1996	K764T	Lys	Thr	764	AAG	TRUE	S2	4.6	0.662758			0.147595	0.372907	0.270556
768	GRIN1/GRIN2B	GRIN1		Hirai 1996	D765H	Asp	His	765	GAC	TRUE	S2	2.7	0.431364			0.434783	0.414683	0.241188
769	GRIN1/GRIN2B	GRIN1		Hirai 1996	D765Y	Asp	Tyr	765	GAC	TRUE	S2	3.2	0.50515			0.434783	0.414683	0.241188
770	GRIN1/GRIN2B	GRIN1		Hirai 1996	K769H	Lys	His	769	AAG	FALSE	S2	1.8	0.255273			0.42812	0.58142	0.357928
771	GRIN1/GRIN2B	GRIN1		Hirai 1996	H780P	His	Pro	780	CAC	TRUE	S2-M4	5.4	0.732394			0.421801	0	0.00389023
772	GRIN1/GRIN2A	GRIN2A		Serraz 2016	P79R	Pro	Arg	79	CCC	TRUE	ATD	4.2	0.623249			0.883634	0.620372	0.36171
773	GRIN1/GRIN2A	GRIN2A		Serraz 2016	F183I	Phe	Ile	183	TTC	TRUE	ATD	3.4	0.531479			0.414028	0.497558	0.226852
774	GRIN1/GRIN2A	GRIN2A		Serraz 2016	I184S	Ile	Ser	184	ATC	TRUE	ATD	3.3	0.518514			0.447867	0.570065	0.381118
775	GRIN1/GRIN2A	GRIN2A		Serraz 2016	A243V	Ala	Val	243	GCC	TRUE	ATD	4.8	0.681241			0.636832	0.585853	0.366746
776	GRIN1/GRIN2A	GRIN2A		Serraz 2016	A290V	Ala	Val	290	GCG	TRUE	ATD	4	0.60206			0.705528	0.822097	0.176537
777	GRIN1/GRIN2A	GRIN2A		Serraz 2016	G295S	Gly	Ser	295	GGC	TRUE	ATD	4	0.60206			0.734829	0.685504	0.396274
778	GRIN1/GRIN2A	GRIN2A		Serraz 2016	R370W	Arg	Trp	370	CGG	TRUE	ATD	5	0.69897			0.80719	0.64409	0.377553
780	GRIN1/GRIN2B	GRIN1		Laube 1993	C79A	Cys	Ala	79	TGC	FALSE	ATD	1.1	0.0413927			0.54169	0.369354	0.314488
781	GRIN1/GRIN2B	GRIN1		Laube 1993	C308A	Cys	Ala	308	TGC	FALSE	ATD	1.5	0.176091			0.229327	0.343532	0.272799
782	GRIN1/GRIN2B	GRIN1		Laube 1993	C420A	Cys	Ala	420	TGC	FALSE	S1	3	0.477121			0.616517	0.711765	0.216291
783	GRIN1/GRIN2B	GRIN1		Laube 1993	C436A	Cys	Ala	436	TGC	FALSE	S1	2.8	0.447158			0.865082	0.572143	0.381748
784	GRIN1/GRIN2B	GRIN1		Laube 1993	C436S	Cys	Ser	436	TGC	TRUE	S1	3	0.477121			0.865082	0.572143	0.381748
785	GRIN1/GRIN2B	GRIN1		Laube 1993	C454A	Cys	Ala	454	TGT	FALSE	S1	1.3	0.113943			0.937919	0.538446	0.395354
786	GRIN1/GRIN2B	GRIN1		Laube 1993	C454S	Cys	Ser	454	TGT	TRUE	S1	1.7	0.230449			0.937919	0.538446	0.395354
787	GRIN1/GRIN2B	GRIN1		Laube 1993	C455A	Cys	Ala	455	TGC	FALSE	S1	1	0			0.924126	0.698851	0.230859
788	GRIN1/GRIN2B	GRIN1		Laube 1993	C455S	Cys	Ser	455	TGC	TRUE	S1	3	0.477121			0.924126	0.698851	0.230859
789	GRIN1/GRIN2B	GRIN1		Laube 1993	C459A	Cys	Ala	459	TGC	FALSE	S1	3	0.477121			0.916225	0.52458	0.398862
790	GRIN1/GRIN2B	GRIN1		Laube 1993	C744A	Cys	Ala	744	TGC	FALSE	S2	0.7	-0.154902			0.147595	0.373902	0.321617
791	GRIN1/GRIN2B	GRIN1		Laube 1993	C798A	Cys	Ala	798	TGT	FALSE	M4	0.7	-0.154902			0.105346	0.331457	0.210906
792	GRIN1/GRIN2B	GRIN1		Wittekindt 2001	T402A	Thr	Ala	402	ACG	TRUE	S1	2.7	0.431364			0.438944	0.543553	0.35648
793	GRIN1/GRIN2B	GRIN1		Wittekindt 2001	F408A	Phe	Ala	408	TTC	FALSE	S1	3	0.477121			0.324029	0.449182	0.391398
794	GRIN1/GRIN2B	GRIN1		Wittekindt 2001	D481N	Asp	Asn	481	GAT	TRUE	S1	3.5	0.544068			0.25933	0.504808	0.397789
795	GRIN1/GRIN2B	GRIN1		Wittekindt 2001	K483E	Lys	Glu	483	AAG	TRUE	S1	7.2	0.857332			0.280922	0.401318	0.348823
796	GRIN1/GRIN2B	GRIN1		Wittekindt 2001	F484A	Phe	Ala	484	TTC	FALSE	S1	16	1.20412			0.277003	0.162322	0.0534552
797	GRIN1/GRIN2B	GRIN2B		Wittekindt 2001	E413A	Glu	Ala	413	GAG	TRUE	S1	360	2.5563			0.374051	0.0554167	0.0360167
798	GRIN1/GRIN2B	GRIN2B		Wittekindt 2001	Y452A	Tyr	Ala	452	TAC	FALSE	S1	2	0.30103			0.652929	0.4986	0.356861
799	GRIN1/GRIN2B	GRIN2B		Wittekindt 2001	S469A	Ser	Ala	469	TCT	TRUE	S1	3	0.477121			0.21234	0.385714	0.354897
800	GRIN1/GRIN2B	GRIN2B		Wittekindt 2001	K485E	Lys	Glu	485	AAG	TRUE	S1	270	2.43136			0.213366	0	0.0111318
801	GRIN1/GRIN2B	GRIN2B		Wittekindt 2001	K488A	Lys	Ala	488	AAG	FALSE	S1	90	1.95424			0.318182	0.212194	0.149507
802	GRIN1/GRIN2B	GRIN2B		Wittekindt 2001	F757A	Phe	Ala	757	TTT	FALSE	S2	1.1	0.0413927			0.13202	0	0.0104637
803	GRIN1/GRIN2A	GRIN1		Wafford 1995	D481N	Asp	Asn	481	GAT	TRUE	S1	6.16	0.789581			0.25933	0.504808	0.391137
804	GRIN1/GRIN2A	GRIN1		Wafford 1995	K483Q	Lys	Gln	483	AAG	TRUE	S1	9.11	0.959518			0.280922	0.403421	0.324014
805	GRIN1/GRIN2A	GRIN1		Wafford 1995	D511N	Asp	Asn	511	GAC	TRUE	S1	3.46	0.539076			0.585631	0.710168	0.239839
806	GRIN1/GRIN2A	GRIN1		Wafford 1995	R448Q	Arg	Gln	448	CGC	FALSE	S1	4.66	0.668386			0.91629	0.790775	0.114769
807	GRIN1/GRIN2A	GRIN1		Wafford 1995	R489Q	Arg	Gln	489	CGG	TRUE	S1	1.1	0.0413927			0.600448	0.583006	0.389104
808	GRIN1/GRIN2A	GRIN1		Wafford 1995	K531Q	Lys	Gln	531	AAG	TRUE	S1-M1	1.21	0.0827854			0.200603	0.332108	0.199275
809	GRIN1/GRIN2A	GRIN1		Wafford 1995	K544Q	Lys	Gln	544	AAG	TRUE	M1	5.13	0.710117			0.289105	0.268007	0.102769
810	GRIN1/GRIN2A	GRIN1		Wafford 1995	K483A	Lys	Ala	483	AAG	FALSE	S1	2.16	0.334454			0.280922	0.403421	0.324014
811	GRIN1/GRIN2A	GRIN1		Wafford 1995	D481A	Asp	Ala	481	GAT	TRUE	S1	3.55	0.550228			0.25933	0.504808	0.391137
812	GRIN1/GRIN2A	GRIN1		Wafford 1995	D481K	Asp	Lys	481	GAT	FALSE	S1	4.11	0.613842			0.25933	0.504808	0.391137
813	GRIN1/GRIN2A	GRIN2A		Unpublished Data: Glu CRC EC50	K484A	Lys	Ala	484	AAG	FALSE	S1	5.14139	0.71108		465	0.487179	0.240639	0.00724773
814	GRIN1/GRIN2A	GRIN2A		Unpublished Data: Glu CRC EC50	K487A	Lys	Ala	487	AAG	FALSE	S1	2.98924	0.475561		468	0.424679	0.342074	0.0544116
815	GRIN1/GRIN2A	GRIN2A		Unpublished Data: Glu CRC EC50	R692A	Arg	Ala	692	AGA	FALSE	S2	0.768132	-0.114564		673	0.641827	0.133106	0.00109045
816	GRIN1/GRIN2A	GRIN2A		Unpublished Data: Glu CRC EC50	R695A	Arg	Ala	695	CGG	FALSE	S2	0.626314	-0.203208		676	0.624413	0.354825	0.0728281
817	GRIN1/GRIN2A	GRIN2A		Unpublished Data: Glu CRC EC50	E691A	Glu	Ala	691	GAG	TRUE	S2	1.88642	0.275639		672	0.700922	0.25	0.0146536
818	GRIN1/GRIN2A	GRIN2A		Unpublished Data: Glu CRC EC50	K721A	Lys	Ala	721	AAA	FALSE	S2	0.981387	-0.00815967		702	0.346926	0.524079	0.295253
819	GRIN1/GRIN2A	GRIN2A		Unpublished Data: Glu CRC EC50	Y730A	Tyr	Ala	730	TAC	FALSE	S2	11.6134	1.06496		711	0.490244	0.189533	0.00481473
820	GRIN1/GRIN2A	GRIN2A		Unpublished Data: Glu CRC EC50	K738A	Lys	Ala	738	AAG	FALSE	S2	1.89418	0.27742		719	0.310265	0.2558	0.0125086
821	GRIN1/GRIN2A	GRIN2A		Unpublished Data: Glu CRC EC50	K746A	Lys	Ala	746	AAG	FALSE	S2	0.605669	-0.217765		727	0.442244	0.553571	0.351982
822	GRIN1/GRIN2A	GRIN2A		Unpublished Data: 2pt Glu curve EC50est	H405A	His	Ala	405	CAT	FALSE	S1	1.46943	0.167149		386	0.339968	0.631308	0.374528
823	GRIN1/GRIN2A	GRIN2A		Unpublished Data: 2pt Glu curve EC50est	R431A	Arg	Ala	431	AGG	FALSE	S1	4.20075	0.623327		412	0.67656	0.495054	0.210713
824	GRIN1/GRIN2A	GRIN2A		Unpublished Data: 2pt Glu curve EC50est	R437A	Arg	Ala	437	CGG	FALSE	S1	3.6404	0.561149		418	0.86859	0.65865	0.374725
825	GRIN1/GRIN2A	GRIN2A		Unpublished Data: 2pt Glu curve EC50est	K438A	Lys	Ala	438	AAG	FALSE	S1	1.829	0.262214		419	0.878111	0.831152	0.144096
826	GRIN1/GRIN2A	GRIN2A		Unpublished Data: 2pt Glu curve EC50est	K441A	Lys	Ala	441	AAA	FALSE	S1	4.95648	0.695173		422	0.847619	0.868029	0.1575
827	GRIN1/GRIN2A	GRIN2A		Unpublished Data: 2pt Glu curve EC50est	K453A	Lys	Ala	453	AAG	FALSE	S1	2.60283	0.415446		434	0.932243	0.589579	0.362802
828	GRIN1/GRIN2A	GRIN2A		Unpublished Data: 2pt Glu curve EC50est	K454A	Lys	Ala	454	AAA	FALSE	S1	2.26163	0.354422		435	0.965002	0.620861	0.390545
829	GRIN1/GRIN2A	GRIN2A		Unpublished Data: 2pt Glu curve EC50est	K457A	Lys	Ala	457	AAG	FALSE	S1	3.08346	0.489039		438	0.92891	0.442103	0.0961233
830	GRIN1/GRIN2A	GRIN2A		Unpublished Data: 2pt Glu curve EC50est	D462P	Asp	Pro	462	GAT	FALSE	S1	1.88266	0.274771		443	0.763741	0.459254	0.118191
831	GRIN1/GRIN2A	GRIN2A		Unpublished Data: 2pt Glu curve EC50est	K465A	Lys	Ala	465	AAG	FALSE	S1	2.47743	0.394002		446	0.606685	0.453107	0.180255
832	GRIN1/GRIN2A	GRIN2A		Unpublished Data: 2pt Glu curve EC50est	K466A	Lys	Ala	466	AAG	FALSE	S1	4.89183	0.689472		447	0.646341	0.773077	0.26913
833	GRIN1/GRIN2A	GRIN2A		Unpublished Data: 2pt Glu curve EC50est	R469A	Arg	Ala	469	AGA	FALSE	S1	3.31141	0.520013		450	0.562036	0.624808	0.393812
834	GRIN1/GRIN2A	GRIN2A		Unpublished Data: 2pt Glu curve EC50est	K472A	Lys	Ala	472	AAG	FALSE	S1	2.52285	0.401891		453	0.520976	0.423126	0.13932
836	GRIN1/GRIN2A	GRIN2A		Unpublished Data: 2pt Glu curve EC50est	K487Q	Lys	Gln	487	AAG	TRUE	S1	1.6814	0.22567		468	0.424679	0.342074	0.0544116
837	GRIN1/GRIN2A	GRIN2A		Unpublished Data: 2pt Glu curve EC50est	K488Q	Lys	Gln	488	AAA	TRUE	S1	2.02655	0.306758		469	0.402328	0.393822	0.0905321
838	GRIN1/GRIN2A	GRIN2A		Unpublished Data: 2pt Glu curve EC50est	R539Q	Arg	Gln	539	AGA	FALSE	S1	2.9787	0.474027		520	0.268317	0.214402	0.0069156
839	GRIN1/GRIN2A	GRIN2A		Unpublished Data: 2pt Glu curve EC50est	E551Q	Glu	Gln	551	GAA	TRUE	S1-M1	1.98209	0.297124		532	0.358782	0.159169	0.00254977
840	GRIN1/GRIN2A	GRIN2A		Unpublished Data: 2pt Glu curve EC50est	R681A	Arg	Ala	681	CGA	FALSE	S2	2.78594	0.444972		662	0.858054	0.77767	0.323509
841	GRIN1/GRIN2A	GRIN2A		Unpublished Data: 2pt Glu curve EC50est	E691A	Glu	Ala	691	GAG	TRUE	S2	4.19175	0.622395		672	0.700922	0.25	0.0146536
844	GRIN1/GRIN2A	GRIN2A		Unpublished Data: 2pt Glu curve EC50est	H702A	His	Ala	702	CAT	FALSE	S2	1.92113	0.283556		683	0.307243	0.658489	0.386188
845	GRIN1/GRIN2A	GRIN2A		Unpublished Data: 2pt Glu curve EC50est	K707A	Lys	Ala	707	AAA	FALSE	S2	2.23926	0.350104		688	0.622642	0.803688	0.221113
846	GRIN1/GRIN2A	GRIN2A		Unpublished Data: 2pt Glu curve EC50est	K711A	Lys	Ala	711	AAA	FALSE	S2	2.87368	0.458438		692	0.553459	0.299437	0.0237814
847	GRIN1/GRIN2A	GRIN2A		Unpublished Data: 2pt Glu curve EC50est	E714A	Glu	Ala	714	GAG	TRUE	S2	1.87561	0.273142		695	0.504265	0.533469	0.2948
848	GRIN1/GRIN2A	GRIN2A		Unpublished Data: 2pt Glu curve EC50est	D715A	Asp	Ala	715	GAC	TRUE	S2	3.97761	0.599622		696	0.454976	0.471499	0.241934
850	GRIN1/GRIN2A	GRIN2A		Unpublished Data: 2pt Glu curve EC50est	K724A	Lys	Ala	724	AAG	FALSE	S2	2.98664	0.475183		705	0.347712	0.613892	0.390345
852	GRIN1/GRIN2A	GRIN2A		Unpublished Data: 2pt Glu curve EC50est	R741A	Arg	Ala	741	AGG	FALSE	S2	2.19502	0.341438		722	0.431562	0.427628	0.140223
854	GRIN1/GRIN2A	GRIN2A		Unpublished Data: 2pt Glu curve EC50est	K767A	Lys	Ala	767	AAA	FALSE	S2	3.15762	0.499359		748	0.493812	0.734905	0.334129
855	GRIN1/GRIN2A	GRIN2A		Unpublished Data: 2pt Glu curve EC50est	K772A	Lys	Ala	772	AAG	FALSE	S2	5.02812	0.701405		753	0.534	0.534868	0.346406
856	GRIN1/GRIN2A	GRIN2A		Unpublished Data: 2pt Glu curve EC50est	R773A	Arg	Ala	773	AGG	FALSE	S2	2.93522	0.46764		754	0.613793	0.567367	0.28408
857	GRIN1/GRIN2A	GRIN2A		Unpublished Data: 2pt Glu curve EC50est	D785A	Asp	Ala	785	GAT	TRUE	S2	2.28908	0.35966		766	0.519024	0.753113	0.286171
858	GRIN1/GRIN2A	GRIN2A		Unpublished Data: 2pt Glu curve EC50est	E787A	Glu	Ala	787	GAG	TRUE	S2	1.62638	0.211222		768	0.454751	0.890909	0.0954675
859	GRIN1/GRIN2B	GRIN1		Hrcka Krausova 2020	Q559A	Gln	Ala	559	CAG	FALSE	M1	1.65	0.217484			0.272362	0	0.00391127
860	GRIN1/GRIN2B	GRIN1		Hrcka Krausova 2020	W563A	Trp	Ala	563	TGG	FALSE	M1-M2	0.1	-1			0.152076	0	0.00382135
861	GRIN1/GRIN2B	GRIN1		Hrcka Krausova 2020	L564A	Leu	Ala	564	CTG	FALSE	M1-M2	1.43	0.155336			0	0	0.00569589
862	GRIN1/GRIN2B	GRIN1		Hrcka Krausova 2020	S569A	Ser	Ala	569	TCG	TRUE	M1-M2	3.69	0.567026			0.300719	0	0.00476836
863	GRIN1/GRIN2B	GRIN1		Hrcka Krausova 2020	G638A	Gly	Ala	638	GGC	TRUE	M3-S2	1.41	0.149219			0.272	0	0.00491695
864	GRIN1/GRIN2B	GRIN1		Hrcka Krausova 2020	I642A	Ile	Ala	642	ATC	FALSE	S2	1.24	0.0934217			0.229798	0.26147	0.125216
865	GRIN1/GRIN2B	GRIN1		Hrcka Krausova 2020	N812A	Asn	Ala	812	AAC	FALSE	CTD	0.36	-0.443697			0.121359	0	0.0057204
866	GRIN1/GRIN2B	GRIN1		Hrcka Krausova 2020	G815A	Gly	Ala	815	GGG	TRUE	CTD	2.65	0.423246			0.104449	0	0.00477577
867	GRIN1/GRIN2B	GRIN1		Hrcka Krausova 2020	F817A	Phe	Ala	817	TTC	FALSE	CTD	1.48	0.170262			0.111378	0.213858	0.105337
868	GRIN1/GRIN2B	GRIN1		Hrcka Krausova 2020	M818A	Met	Ala	818	ATG	FALSE	CTD	2.97	0.472756			0.191856	0.202703	0.0797952
869	GRIN1/GRIN2B	GRIN1		Hrcka Krausova 2020	L819A	Leu	Ala	819	CTG	FALSE	CTD	2.89	0.460898			0.206871	0.327713	0.245071
870	GRIN1/GRIN2B	GRIN1		Hrcka Krausova 2020	G822A	Gly	Ala	822	GGG	TRUE	CTD	1.58	0.198657			0.204385	0.327381	0.216055
871	GRIN1/GRIN2B	GRIN2B		Hrcka Krausova 2020	W559L	Trp	Leu	559	TGG	TRUE	M1	1.24	0.0934217			0.243024	0	0.0114999
872	GRIN1/GRIN2B	GRIN2B		Hrcka Krausova 2020	M562A	Met	Ala	562	ATG	FALSE	M1	3.74	0.572872			0.435897	0.252675	0.181824
873	GRIN1/GRIN2B	GRIN2B		Hrcka Krausova 2020	V564A	Val	Ala	564	GTG	TRUE	M1	1.41	0.149219			0.396025	0.242894	0.175011
874	GRIN1/GRIN2B	GRIN2B		Hrcka Krausova 2020	L567A	Leu	Ala	567	CTC	FALSE	M1	1.08	0.0334238			0.365229	0.290984	0.271366
875	GRIN1/GRIN2B	GRIN2B		Hrcka Krausova 2020	D816A	Asp	Ala	816	GAC	TRUE	S2-M4	0.17	-0.769551			0.222954	0.16337	0.0891509
876	GRIN1/GRIN2B	GRIN2B		Hrcka Krausova 2020	M818A	Met	Ala	818	ATG	FALSE	M4	1.74	0.240549			0.206061	0.175389	0.0938384
877	GRIN1/GRIN2B	GRIN2B		Hrcka Krausova 2020	G820A	Gly	Ala	820	GGG	TRUE	M4	1.56	0.193125			0.104358	0.167698	0.0324291
878	GRIN1/GRIN2B	GRIN2B		Hrcka Krausova 2020	F822A	Phe	Ala	822	TTC	FALSE	M4	1.35	0.130334			0.10474	0.165255	0.0819356
879	GRIN1/GRIN2B	GRIN2B		Hrcka Krausova 2020	Y823A	Tyr	Ala	823	TAC	FALSE	M4	1.63	0.212188			0.193366	0.147608	0.0840517
880	GRIN1/GRIN2B	GRIN2B		Hrcka Krausova 2020	M824A	Met	Ala	824	ATG	FALSE	M4	4.05	0.607455			0.191781	0.23706	0.180523
881	GRIN1/GRIN2B	GRIN2B		Hrcka Krausova 2020	L825A	Leu	Ala	825	TTG	FALSE	M4	4.17	0.620136			0.268349	0.194515	0.139353
882	GRIN1/GRIN2B	GRIN2B		Hrcka Krausova 2020	M829A	Met	Ala	829	ATG	FALSE	M4	1.67	0.222716			0.355497	0.114636	0.0680301
883	GRIN1/GRIN2B	GRIN2B		Hrcka Krausova 2020	A830T	Ala	Thr	830	GCT	TRUE	M4	1.69	0.227887			0.35582	0.215616	0.170654

## Sheet: wild_type_Data
	Supplemental Dataset 2B: Published wild type EC50 dataset. The receptor complex tested is noted (receptor). The Publication Source is listed, see Methods for the specific citations. The published glutamate EC50 (gluEC50) is listed as well as the logEC50 (pGluEC50). Some datapoints were only plotted, if so, the graph was measured (noted in the comment column).
entry#	receptor	Publication Source	GluEC50	pGluEC50	comment
2	GRIN1/GRIN2A	Chen 2005	3.5	0.544068
3	GRIN1/GRIN2A	Erreger 2007	3.3	0.518514
4	GRIN1/GRIN2B	Erreger 2007	2.86	0.456366
9	GRIN1/GRIN2A	Inanobe 2005	3.74	0.572872
11	GRIN1/GRIN2B	Kashiwagi 1996	2.4	0.380211
12	GRIN1/GRIN2A	Low 2000	5.9	0.770852
13	GRIN1/GRIN2A	Swanger 2016	3.4	0.531479
14	GRIN1/GRIN2B	Swanger 2016	1.5	0.176091
15	GRIN1/GRIN2A	Ren 2013	8.6045	0.934726	measured
16	GRIN1/GRIN2A	Wang 2018	1.28539	0.109036	measured
25	GRIN1/GRIN2A	Furukawa 2005	4.79	0.680336
27	GRIN1/GRIN2B	Kashiwagi 1997	1.53	0.184691
33	GRIN1/GRIN2B	Williams 1995	1.4	0.146128
35	GRIN1/GRIN2B	Williams 1998	1.4	0.146128
38	GRIN1/GRIN2A	Addis 2017	0.42	-0.376751	calcium imaging
39	GRIN1/GRIN2A	Anson 1998	2.89	0.460898
41	GRIN1/GRIN2A	Ogden 2017	4	0.60206
42	GRIN1/GRIN2A	Ogden 2017	4.1	0.612784
43	GRIN1/GRIN2A	Ogden 2017	3.3	0.518514
44	GRIN1/GRIN2B	Ogden 2017	1.6	0.20412
47	GRIN1/GRIN2A	Chen 2017	3.7	0.568202
48	GRIN1/GRIN2A	Li 2019	4.9	0.690196
49	GRIN1/GRIN2B	Li 2019	1.5	0.176091
50	GRIN1/GRIN2A	Yuan 2014	3.5	0.544068
51	GRIN1/GRIN2A	Yuan 2014	3.6	0.556303
52	GRIN1/GRIN2B	Yuan 2014	1.3	0.113943
55	GRIN1/GRIN2A	McDaniel 2020	3.5	0.544068
57	GRIN1/GRIN2A	Fayyazuddin 2000	5.9	0.770852
58	GRIN1/GRIN2B	Laube 2004	1.5	0.176091
59	GRIN1/GRIN2B	Bledsoe 2017	1.97	0.294466
60	GRIN1/GRIN2A	Skrenkova 2020	4.94	0.693727
61	GRIN1/GRIN2B	Skrenkova 2020	1.89	0.276462
62	GRIN1/GRIN2A	Kuryatov 1994	3	0.477121
63	GRIN1/GRIN2B	Kuryatov 1994	1.5	0.176091
64	GRIN1/GRIN2A	Maier 2007	3.3	0.518514
65	GRIN1/GRIN2B	Hirai 1996	2.8	0.447158
66	GRIN1/GRIN2A	Serraz 2016	4.3	0.633468
67	GRIN1/GRIN2B	Laube 1993	1.5	0.176091
68	GRIN1/GRIN2B	Wittekindt 2001	1.5	0.176091
69	GRIN1/GRIN2A	Wafford 1995	3.26	0.513218
70	GRIN1/GRIN2A	Unpublished Data: Glu CRC EC50	3.05	0.4843
71	GRIN1/GRIN2A	Unpublished Data: 2pt Glu curve EC50est	3.1355	0.496307
72	GRIN1/GRIN2B	Hrcka Krausova 2020	1.41	0.149219
